# Supplementary material
Source: PubMed Central journal article supplement (PMC4784861)
Supplement: coxj027121.ww1_default.pdf [file coxj027121.ww1_default.pdf]

| <b>Group Name</b>     | <b>clinical cod</b> | <b>clinical term</b>                                      |
|-----------------------|---------------------|-----------------------------------------------------------|
| Blindness (Read code) | 2B6A-1              | O/E - blind R-eye                                         |
| Blindness (Read code) | 2B6B                | O/E - R-eye completely blind                              |
| Blindness (Read code) | 2B6S                | O/E - pinhole R-eye completely blind                      |
| Blindness (Read code) | 2B7A-1              | O/E - blind L-eye                                         |
| Blindness (Read code) | 2B7B                | O/E - L-eye completely blind                              |
| Blindness (Read code) | 2B7S                | O/E - pinhole L-eye completely blind                      |
| Blindness (Read code) | 6688                | Registered partially sighted                              |
| Blindness (Read code) | 6688-1              | Registered partially blind                                |
| Blindness (Read code) | 6689                | Registered blind                                          |
| Blindness (Read code) | 6689-1              | Registered severely sight impaired                        |
| Blindness (Read code) | 668C                | Certificate of vision impairment                          |
| Blindness (Read code) | 8F6-1               | Blind rehabilitation                                      |
| Blindness (Read code) | 8F61                | Blind rehabilitation                                      |
| Blindness (Read code) | 8F62                | Blind lead dog rehabilitation                             |
| Blindness (Read code) | 9m08                | Excluded from diabetic retinopathy screening as blind     |
| Blindness (Read code) | EGTONBL2            | Blind (subjectively)                                      |
| Blindness (Read code) | EGTONVI8            | Vision - blind despite any aid                            |
| Blindness (Read code) | F49                 | Blindness and low vision                                  |
| Blindness (Read code) | F49-1               | Impaired vision                                           |
| Blindness (Read code) | F49-2               | Low vision                                                |
| Blindness (Read code) | F49-3               | Partial sight                                             |
| Blindness (Read code) | F49-4               | Sight impaired                                            |
| Blindness (Read code) | F490                | Blindness, both eyes                                      |
| Blindness (Read code) | F490-98             | Blind/low vision - both eyes                              |
| Blindness (Read code) | F490-99             | Blind - both eyes                                         |
| Blindness (Read code) | F4900               | Unspecified blindness both eyes                           |
| Blindness (Read code) | F4902               | Better eye: near total VI, Lesser eye: unspecified        |
| Blindness (Read code) | F4903               | Better eye: near total VI, Lesser eye: total VI           |
| Blindness (Read code) | F4904               | Better eye: near total VI, Lesser eye: near total VI      |
| Blindness (Read code) | F4905               | Better eye: profound VI, Lesser eye: unspecified          |
| Blindness (Read code) | F4906               | Better eye: profound VI, Lesser eye: total VI             |
| Blindness (Read code) | F4907               | Better eye: profound VI, Lesser eye: near total VI        |
| Blindness (Read code) | F4908               | Better eye: profound VI, Lesser eye: profound VI          |
| Blindness (Read code) | F4909               | Acquired blindness, both eyes                             |
| Blindness (Read code) | F490z               | Blindness both eyes NOS                                   |
| Blindness (Read code) | F491                | Better eye: low vision, Lesser eye: profound VI           |
| Blindness (Read code) | F4910               | One eye blind, one eye low vision                         |
| Blindness (Read code) | F4911               | Better eye: severe VI, Lesser eye: blind, unspecified     |
| Blindness (Read code) | F4912               | Better eye: severe VI, Lesser eye: total VI               |
| Blindness (Read code) | F4913               | Better eye: severe VI, Lesser eye: near total VI          |
| Blindness (Read code) | F4914               | Better eye: severe VI, Lesser eye: profound VI            |
| Blindness (Read code) | F4915               | Better eye: moderate VI, Lesser eye: blind, unspecified   |
| Blindness (Read code) | F4916               | Better eye: moderate VI, Lesser eye: total VI             |
| Blindness (Read code) | F4917               | Better eye: moderate VI, Lesser eye: near total VI        |
| Blindness (Read code) | F4918               | Better eye: moderate VI, Lesser eye: profound VI          |
| Blindness (Read code) | F491z               | One eye blind, one eye low vision NOS                     |
| Blindness (Read code) | F492                | Low vision, both eyes                                     |
| Blindness (Read code) | F4920               | Low vision, both eyes unspecified                         |
| Blindness (Read code) | F4921               | Better eye: severe VI, Lesser eye: low vision unspecified |

|                        |                     |                                                                      |
|------------------------|---------------------|----------------------------------------------------------------------|
| Blindness (Read code)  | F4922               | Better eye: severe VI, Lesser eye: severe VI                         |
| Blindness (Read code)  | F4923               | Better eye: moderate VI, Lesser eye: low vision unspecified          |
| Blindness (Read code)  | F4924               | Better eye: moderate VI, Lesser eye: severe VI                       |
| Blindness (Read code)  | F4925               | Better eye: moderate VI, Lesser eye: moderate VI                     |
| Blindness (Read code)  | F492z               | Low vision, both eyes NOS                                            |
| Blindness (Read code)  | F493                | Visual loss, both eyes unqualified                                   |
| Blindness (Read code)  | F493-99             | Blind/low vision - both eyes                                         |
| Blindness (Read code)  | F494                | Legal blindness USA                                                  |
| Blindness (Read code)  | F495                | Profound impairment, one eye                                         |
| Blindness (Read code)  | F4950               | Blindness, one eye, unspecified                                      |
| Blindness (Read code)  | F4951               | Lesser eye: total visual impairment, Better eye: unspecified         |
| Blindness (Read code)  | F4952               | Lesser eye: total VI, Better eye: near normal vision                 |
| Blindness (Read code)  | F4953               | Lesser eye: total VI, Better eye: normal vision                      |
| Blindness (Read code)  | F4954               | Lesser eye: near total VI, Better eye: unspecified                   |
| Blindness (Read code)  | F4955               | Lesser eye: near total VI, Better eye: near normal vision            |
| Blindness (Read code)  | F4956               | Lesser eye: near total VI, Better eye: normal vision                 |
| Blindness (Read code)  | F4957               | Lesser eye: profound VI, Better eye: unspecified                     |
| Blindness (Read code)  | F4958               | Lesser eye: profound VI, Better eye: near normal vision              |
| Blindness (Read code)  | F4959               | Lesser eye: profound VI, Better eye: normal vision                   |
| Blindness (Read code)  | F495A               | Acquired blindness, one eye                                          |
| Blindness (Read code)  | F495z               | Profound impairment one eye NOS                                      |
| Blindness (Read code)  | F496                | Low vision, one eye                                                  |
| Blindness (Read code)  | F496-99             | Blind/low vision -one eye only                                       |
| Blindness (Read code)  | F4960               | Low vision, one eye, unspecified                                     |
| Blindness (Read code)  | F4961               | Lesser eye: severe VI, Better eye: unspecified                       |
| Blindness (Read code)  | F4962               | Lesser eye: severe VI, Better eye: near normal vision                |
| Blindness (Read code)  | F4963               | Lesser eye: severe VI, Better eye: normal vision                     |
| Blindness (Read code)  | F4964               | Lesser eye: moderate VI, Better eye: unspecified                     |
| Blindness (Read code)  | F4965               | Lesser eye: moderate VI, Better eye: near normal vision              |
| Blindness (Read code)  | F4966               | Lesser eye: moderate VI, Better eye: normal vision                   |
| Blindness (Read code)  | F496z               | Low vision, one eye NOS                                              |
| Blindness (Read code)  | F49y                | Visual loss, one eye, unqualified                                    |
| Blindness (Read code)  | F49y-99             | Blind/low vision -one eye only                                       |
| Blindness (Read code)  | F49z                | Visual loss NOS                                                      |
| Blindness (Read code)  | F49z-1              | Acquired blindness                                                   |
| Blindness (Read code)  | F49z-99             | Blindness/low vision NOS                                             |
| Blindness (Read code)  | F49z0               | Charles Bonnet syndrome                                              |
| Blindness (ICD10)      | H54                 | H54 - Visual impairment including blindness (binocular or monocular) |
| Blindness (ICD10)      | H540                | H540 - Blindness, binocular                                          |
| Blindness (ICD10)      | H541                | H541 - Severe visual impairment, binocular                           |
| Blindness (ICD10)      | H544                | H544 - Blindness, monocular                                          |
| Blindness (ICD10)      | H545                | H545 - Severe visual impairment, monocular                           |
| Blindness (ICD10)      | H549                | H549 - Unspecified visual impairment (binocular)                     |
| <b>Group Name</b>      | <b>clinical cod</b> | <b>clinical term</b>                                                 |
| Amputation (Read code) | 14N4                | H/O: limb amputation                                                 |
| Amputation (Read code) | 14N4-1              | Amputee - limb                                                       |
| Amputation (Read code) | 14N41               | H/O: lower limb amputation                                           |
| Amputation (Read code) | 14N4Z               | H/O: limb amputation NOS                                             |
| Amputation (Read code) | 2G42                | O/E - Amputated right leg                                            |
| Amputation (Read code) | 2G43                | O/E - Amputated left leg                                             |

|                        |          |                                            |
|------------------------|----------|--------------------------------------------|
| Amputation (Read code) | 2G44     | O/E - Amputated right above knee           |
| Amputation (Read code) | 2G45     | O/E - Amputated left above knee            |
| Amputation (Read code) | 2G46     | O/E - Amputated right below knee           |
| Amputation (Read code) | 2G47     | O/E - Amputated left below knee            |
| Amputation (Read code) | 2G4A     | O/E - amputated left midfoot               |
| Amputation (Read code) | 2G4B     | O/E - amputated right midfoot              |
| Amputation (Read code) | 7L06     | Amputation of leg                          |
| Amputation (Read code) | 7L06-99  | Amputation - lower limb                    |
| Amputation (Read code) | 7L060    | Hindquarter amputation                     |
| Amputation (Read code) | 7L060-1  | Ferre hindquarter amputation               |
| Amputation (Read code) | 7L060-2  | Gordon - Taylor hindquarter amputation     |
| Amputation (Read code) | 7L060-3  | Jaboulay hindquarter amputation            |
| Amputation (Read code) | 7L060-4  | King hindquarter amputation                |
| Amputation (Read code) | 7L060-5  | Sorrondo hindquarter amputation            |
| Amputation (Read code) | 7L060-6  | Steelquist hindquarter amputation          |
| Amputation (Read code) | 7L060-7  | Taylor hindquarter amputation              |
| Amputation (Read code) | 7L060-99 | Hind quarter amputation                    |
| Amputation (Read code) | 7L061    | Disarticulation of hip                     |
| Amputation (Read code) | 7L061-1  | Boyd disarticulation of hip                |
| Amputation (Read code) | 7L061-2  | Fitzmaurice - Kelly disarticulation of hip |
| Amputation (Read code) | 7L061-99 | Hip disarticulation                        |
| Amputation (Read code) | 7L062    | Amputation above knee                      |
| Amputation (Read code) | 7L062-1  | Kirk amputation of leg through thigh       |
| Amputation (Read code) | 7L062-2  | Amputation of leg through thigh            |
| Amputation (Read code) | 7L062-99 | Above knee amputation                      |
| Amputation (Read code) | 7L063    | Amputation through knee                    |
| Amputation (Read code) | 7L063-1  | Batch disarticulation of knee              |
| Amputation (Read code) | 7L063-2  | Callander disarticulation of knee          |
| Amputation (Read code) | 7L063-3  | Disarticulation of knee                    |
| Amputation (Read code) | 7L063-4  | Gritti-Stokes disarticulation of knee      |
| Amputation (Read code) | 7L063-5  | Kirk disarticulation of knee               |
| Amputation (Read code) | 7L063-6  | Mazet disarticulation of knee              |
| Amputation (Read code) | 7L063-7  | McFaddin disarticulation of knee           |
| Amputation (Read code) | 7L063-8  | Slocum disarticulation of knee             |
| Amputation (Read code) | 7L063-9  | Spittler disarticulation of knee           |
| Amputation (Read code) | 7L063-99 | Knee disarticulation                       |
| Amputation (Read code) | 7L064    | Amputation below knee                      |
| Amputation (Read code) | 7L064-1  | Boyd amputation of leg below knee          |
| Amputation (Read code) | 7L064-2  | Burgess amputation of leg below knee       |
| Amputation (Read code) | 7L064-3  | Guyon amputation of leg below knee         |
| Amputation (Read code) | 7L064-98 | Below knee amputation                      |
| Amputation (Read code) | 7L064-99 | Supramalleolar ankle amputat.              |
| Amputation (Read code) | 7L06y    | Other specified amputation of leg          |
| Amputation (Read code) | 7L06z    | Amputation of leg NOS                      |
| Amputation (Read code) | 7L06z-99 | Amputation lower limb NOS                  |
| Amputation (Read code) | 7L07     | Amputation of foot                         |
| Amputation (Read code) | 7L070    | Amputation through ankle                   |
| Amputation (Read code) | 7L070-1  | Pirogoff amputation of foot through ankle  |
| Amputation (Read code) | 7L070-2  | Syme amputation of foot through ankle      |
| Amputation (Read code) | 7L070-99 | Disarticulation of foot                    |

|                          |          |                                            |
|--------------------------|----------|--------------------------------------------|
| Amputation (Read code)   | 7L071    | Disarticulation of tarsal bones            |
| Amputation (Read code)   | 7L071-1  | Boyd amputation of hindfoot                |
| Amputation (Read code)   | 7L071-99 | Amputation foot: mid-tarsal                |
| Amputation (Read code)   | 7L072    | Disarticulation tarsometatarsal joint      |
| Amputation (Read code)   | 7L072-1  | Lisfranc tarsometatarsal amputation        |
| Amputation (Read code)   | 7L072-2  | Tarsometatarsal amputation                 |
| Amputation (Read code)   | 7L072-3  | Disarticulation of metatarsal bones        |
| Amputation (Read code)   | 7L072-99 | Amputation foot:tarsal-metatar             |
| Amputation (Read code)   | 7L073    | Amputation through metatarsal bones        |
| Amputation (Read code)   | 7L073-1  | Chopart midtarsal amputation               |
| Amputation (Read code)   | 7L073-2  | Ray transmetatarsal amputation             |
| Amputation (Read code)   | 7L07y    | Other specified amputation of foot         |
| Amputation (Read code)   | 7L07z    | Amputation of foot NOS                     |
| Amputation (Read code)   | 7L07z-1  | Hey amputation of foot                     |
| Amputation (Read code)   | 7L08     | Amputation of toe                          |
| Amputation (Read code)   | 7L080    | Amputation hallux                          |
| Amputation (Read code)   | 7L080-1  | Amputation great toe                       |
| Amputation (Read code)   | 7L081    | Amputation of phalanx of toe               |
| Amputation (Read code)   | 7L082    | Proximal hemiphalangectomy of toe          |
| Amputation (Read code)   | 7L083    | Amputation lesser toe                      |
| Amputation (Read code)   | 7L084    | Terminalisation of hallux                  |
| Amputation (Read code)   | 7L085    | Terminalisation of lesser toe              |
| Amputation (Read code)   | 7L08y    | Other specified amputation of toe          |
| Amputation (Read code)   | 7L08z    | Amputation of toe NOS                      |
| Amputation (Read code)   | 7L08z-1  | Disarticulation of toe NOS                 |
| Amputation (OPCS-4 code) | X093     | X093 - Amputation of leg above knee        |
| Amputation (OPCS-4 code) | X094     | X094 - Amputation of leg through knee      |
| Amputation (OPCS-4 code) | X095     | X095 - Amputation of leg below knee        |
| Amputation (OPCS-4 code) | X098     | X098 - Other specified amputation of leg   |
| Amputation (OPCS-4 code) | X099     | X099 - Unspecified amputation of leg       |
| Amputation (OPCS-4 code) | X10      | X10 - Amputation of foot                   |
| Amputation (OPCS-4 code) | X101     | X101 - Amputation of foot through ankle    |
| Amputation (OPCS-4 code) | X104     | X104 - Amputation through metatarsal bones |
| Amputation (OPCS-4 code) | X108     | X108 - Other specified amputation of foot  |
| Amputation (OPCS-4 code) | X109     | X109 - Unspecified amputation of foot      |
| Amputation (OPCS-4 code) | X11      | X11 - Amputation of toe                    |
| Amputation (OPCS-4 code) | X111     | X111 - Amputation of great toe             |
| Amputation (OPCS-4 code) | X112     | X112 - Amputation of phalanx of toe        |
| Amputation (OPCS-4 code) | X118     | X118 - Other specified amputation of toe   |
| Amputation (OPCS-4 code) | X119     | X119 - Unspecified amputation of toe       |
